# 1 An afferent white matter pathway from the 2 pulvinar to the amygdala facilitates fear 3 recognition

4 *Jessica McFadyen*<sup>1,2\*</sup>, *Jason B. Mattingley*<sup>1,3</sup>, & *Marta I. Garrido*<sup>1,2,4,5</sup>

5 <sup>1</sup>Queensland Brain Institute, University of Queensland, Brisbane, QLD 4072 Australia

6 <sup>2</sup>Australian Research Council of Excellence for Integrative Brain Function, Australia

7 <sup>3</sup>School of Psychology, University of Queensland, Brisbane, QLD 4072 Australia

8 <sup>4</sup>School of Mathematics and Physics, University of Queensland, Brisbane, QLD 4072 Australia

9 <sup>5</sup>Centre for Advanced Imaging, University of Queensland, Brisbane, QLD 4072 Australia

10 \* corresponding author: [j.mcfadyen@uq.edu.au](mailto:j.mcfadyen@uq.edu.au)

## 11 **ABSTRACT**

12 Our ability to rapidly detect threats is thought to be subserved by a subcortical pathway that quickly conveys  
13 visual information to the amygdala. This neural shortcut has been demonstrated in animals but has rarely  
14 been shown in the human brain. Importantly, it remains unclear whether such a pathway might influence  
15 neural activity and behaviour. We conducted a multimodal neuroimaging study of 622 participants from the  
16 Human Connectome Project. We applied probabilistic tractography to diffusion-weighted images,  
17 reconstructing a subcortical pathway to the amygdala from the superior colliculus via the pulvinar. We then  
18 computationally modelled the flow of haemodynamic activity during a face-viewing task and found  
19 evidence for a functionally-afferent pulvinar-amygdala pathway. Critically, individuals with greater fibre  
20 density in this pathway also had stronger dynamic coupling and enhanced fearful face recognition. Our  
21 findings provide converging evidence for the recruitment of an afferent subcortical pulvinar connection to  
22 the amygdala that facilitates fear recognition.

## 23 **INTRODUCTION**

24 Decades ago, rodent research uncovered a subcortical pathway to the amygdala that rapidly transmits  
25 auditory signals of threat even when the auditory cortex is destroyed (LeDoux, 1998). Since this discovery,  
26 researchers have sought an equivalent visual pathway that might explain how it is that people with a lesioned  
27 primary visual cortex can still respond to affective visual stimuli that they cannot consciously see (Tamietto  
28 and de Gelder, 2010). The superior colliculus, pulvinar, and amygdala have been identified as nodes of a  
29 human subcortical route to the amygdala that bypasses the cortex (Morris et al., 1999). These subcortical  
30 areas consistently coactivate in cortically blind patients (Pegna et al., 2005) – as well as in healthy adults

31 (Vuilleumier et al., 2003, Morris et al., 1999) – when they view emotional stimuli, such as angry or fearful  
32 faces. Magnetoencephalography studies using computational modelling have investigated whether the  
33 activation of these subcortical nodes is causally related. These studies have consistently found evidence for  
34 a forward connection between the pulvinar and amygdala (McFadyen et al., 2017, Garvert et al., 2014,  
35 Rudrauf et al., 2008). The dynamic causal relationship between the superior colliculus and the pulvinar,  
36 however, remains unexplored in the human brain (Soares et al., 2017). The pulvinar also has several  
37 functional and cytoarchitectural subregions (Barron et al., 2015) and it is unclear how these connect to the  
38 superior colliculus and the amygdala and what roles these subregions may play in mediating transmission  
39 along the subcortical route (Koller et al., 2018, Pessoa and Adolphs, 2010). As such, the hypothesis that the  
40 subcortical route rapidly transfers information from the retina to the amygdala without interference has been  
41 heavily criticised (Pessoa and Adolphs, 2010, Pessoa and Adolphs, 2011). Furthermore, the pulvinar is  
42 highly connected with a widespread network of cortical regions that may contribute to transmission along  
43 the subcortical route (Bridge et al., 2016, Zhou et al., 2016). Hence, it remains unknown whether the  
44 functional activation of the human superior colliculus, pulvinar and amygdala during affective processing  
45 bears any relation to an underlying structural pathway (Pessoa and Adolphs, 2010).

46 Recent animal research has revealed several potential direct subcortical pathways that have a causal  
47 relationship with fearful behaviour in response to visual threats (Zhou et al., 2017, Wei et al., 2015, Shang  
48 et al., 2015). In the absence of relevant post-mortem human research, however, our anatomical knowledge  
49 of the human subcortical route to the amygdala can only be derived from tractography of diffusion-weighted  
50 images (DWI). Tamietto et al. (2012) examined DWIs from a blindsight patient whose left primary visual  
51 cortex was destroyed. The white matter structure of the subcortical route was estimated for the patient and  
52 for ten healthy, age-matched controls. Critically, the subcortical route had greater fractional anisotropy in  
53 the patient's damaged hemisphere, suggesting a neuroplastic increase in myelination to compensate for the  
54 disrupted cortical pathways (Tamietto et al., 2012). In a similar study, Rafal et al. (2015) used tractography  
55 to investigate the subcortical route in 20 healthy humans and 8 macaques. The subcortical route was  
56 reconstructed in both hemispheres for 19 of the 20 human participants and 7 of the 8 macaques (Rafal et al.,  
57 2015). Notably, this sample of human participants was recently expanded and re-examined, further  
58 demonstrating that individuals with greater fractional anisotropy along the subcortical route also had a  
59 stronger bias toward threat when making saccades to scenes (Koller et al., 2018).

60 Diffusion tractography may grant insight into the strength of anatomical connectivity between regions but  
61 it cannot reveal the direction of information transfer, nor can it be used as direct evidence alone for the  
62 anatomical existence of a neural pathway. The anatomical presence and the direction-specific neural flow

63 of emotional visual information along the subcortical route has never been concurrently investigated in  
64 humans to definitively show that the subcortical route is a direct, afferent pathway specifically associated  
65 with fear (Pessoa and Adolphs, 2010, Pessoa and Adolphs, 2011). Such a finding would have important  
66 implications for the very foundation of visual threat perception, given this pathway's potential for rapid  
67 information transfer (McFadyen et al., 2017, Silverstein and Ingvar, 2015) and unconscious processing  
68 (Tamietto and de Gelder, 2010). Here, we aimed to comprehensively investigate this putative amygdala  
69 pathway in a large sample of over 600 healthy human adults from the Human Connectome Project (HCP)  
70 dataset using a multimodal imaging approach to encompass structure, function and behaviour. First, we used  
71 DWI to reconstruct the subcortical route from the superior colliculus to the amygdala, via the pulvinar, and  
72 estimated its fibre density on a large sample. Next, we modelled the direction-specific flow of  
73 haemodynamic responses to faces, testing whether a functional subcortical route is recruited to transmit  
74 information toward the amygdala. Finally, we asked whether the fibre density of the subcortical route  
75 predicts both fearful face recognition as well as the strength of dynamic coupling between the superior  
76 colliculus, pulvinar, and amygdala.

## 77 **RESULTS**

### 78 **Reconstructing the subcortical route using tractography**

79 The first step in our investigation was to evaluate the evidence for an anatomical subcortical route to the  
80 amygdala in the healthy human brain. We exploited high-quality neuroimaging data from a large sample of  
81 622 participants made available by the HCP (Van Essen et al., 2013). We then reconstructed the white  
82 matter structure of the subcortical route using two complementary tractography methods for cross-  
83 validation. We began with global tractography, a Bayesian approach to reconstructing whole-brain fibre  
84 configurations that best explain DWI data (see **Online Methods** for details). We discovered that the superior  
85 colliculus (SC) was connected to the pulvinar (PUL; fibre counts for PUL; left:  $M = 13.23$ ,  $SD = 5.56$ , right:  
86  $M = 13.00$ ,  $SD = 5.59$ , minimum of 2 fibres per participant). The pulvinar and the amygdala were also  
87 connected (fibre counts for left:  $M = 5.33$ ,  $SD = 2.79$ , and right:  $M = 6.75$ ,  $SD = 2.90$ ), with most participants  
88 having at least one connecting fibre (zero fibres for left PUL-AMG for 8 participants – only 1.28% of total  
89 sample). Thus, this relatively conservative method of fibre reconstruction (as it takes into account the entire  
90 brain) can reliably detect evidence for a subcortical route across a large sample of participants.

91 We used the probabilistic JHU DTI-based white matter atlas (Mori et al., 2009), implemented in FSL, to  
92 examine any overlap between 20 major fasciculi and the globally-reconstructed fibres. After warping the

93 tractograms into standard space and converting them into track density images, we calculated the total fibre  
94 density within each fasciculus. This revealed that up to 60% of the subcortical route overlapped with major  
95 fasciculi, mainly the anterior thalamic radiation and the corticospinal tract, as well as the inferior  
96 longitudinal and fronto-occipital fasciculi. For the SC-PUL pathway, the major overlap was found in the  
97 anterior thalamic radiation in the left ( $M = 56.11\%$ ,  $SD = 15.56\%$ , range = 9.46% to 100%) and right ( $M =$   
98  $55.78\%$ ,  $SD = 16.97\%$ , range = 4.81% to 96.55%) hemispheres, followed by the corticospinal tract (left:  $M =$   
99  $4.82\%$ ,  $SD = 6.08\%$ , range = 0% to 33%; right:  $M = 21.06\%$ ,  $SD = 12.75\%$ , range = 0% to 69.09%; see  
100 **Fig. 1**). All other fasciculi had mean track densities less than 0.06% of the full SC-PUL pathway. Track  
101 density of the PUL-AMG pathway was mostly found in the corticospinal tract (left:  $M = 33.69\%$ ,  $SD =$   
102  $18.56\%$ , range = 0% to 88.89%; right:  $M = 36.73\%$ ,  $SD = 17.80\%$ , range = 0% to 82.35%), followed by the  
103 anterior thalamic radiation (left:  $M = 20.58\%$ ,  $SD = 14.10\%$ , range = 0% to 70%; right:  $M = 11.32\%$ ,  $SD =$   
104  $8.88\%$ , range = 0% to 52.75%). There was also some overlap with the inferior longitudinal fasciculus (left:  
105  $M = 5.44\%$ ,  $SD = 8.60\%$ , range = 0 to 65.52%; right:  $M = 3.46\%$ ,  $SD = 5.63\%$ , range = 0 to 40.68%) and  
106 the inferior fronto-occipital fasciculus (left:  $M = 1.49\%$ ,  $SD = 6.73\%$ , range = 0 to 86.96%; right:  $M =$   
107  $7.24\%$ ,  $SD = 10.33\%$ , range = 0 to 75.72%). Mean track densities in all other fasciculi were less than 0.30%.

108 After covarying out head motion and removing four participants with outlying standardised residuals ( $z$ -  
109 score threshold =  $\pm 3$ ), we established that there were significantly more fibres connecting the SC and PUL  
110 ( $M = 13.119$ , 95%  $CI = [12.738, 13.500]$ ) than the PUL and AMG ( $M = 6.040$ , 95%  $CI = [5.867, 6.214]$ ;  
111  $F(1,616) = 433.286$ ,  $p = 2.842 \times 10^{-73}$ ,  $\eta_p^2 = .413$ ). We also found a hemispheric lateralisation, such that  
112 there were more reconstructed fibres for the right ( $M = 9.879$ , 95%  $CI = [9.624, 10.135]$ ) than the left ( $M =$   
113  $9.280$ , 95%  $CI = [9.023, 9.537]$ ) hemisphere ( $F(1,616) = 7.583$ ,  $p = .006$ ,  $\eta_p^2 = .012$ ), specifically for the  
114 PUL-AMG pathway ( $F(1,616) = 16.025$ ,  $p = 7.000 \times 10^{-5}$ ,  $\eta_p^2 = .025$ ;  $t(617) = -9.785$ ,  $p = 4.070 \times 10^{-18}$ ,  
115 95%  $CI [-1.714, -1.141]$ ).

116 To uncover more anatomical features of the reconstructed fibres, we used subregion-specific masks of the  
117 amygdala (basolateral, centromedial, and superficial) and the pulvinar (anterior, medial, superior, inferior,  
118 and lateral; see **Methods** for ROI specification details) to determine where the reconstructed fibres  
119 terminated. This masking approach revealed that the global tractography fibres present between the SC and  
120 PUL connected predominantly to the inferior and anterior pulvinar (see **Supplementary Materials Tables**  
121 **3 to 5** for detailed statistics). Between the PUL and AMG, fibres terminated almost exclusively in the  
122 inferior PUL and then predominantly in the basolateral AMG. Hence, the inferior pulvinar served as the  
123 connecting node between the SC and the basolateral AMG for the globally-reconstructed subcortical  
124 pathway. To assess the validity of our findings we used a second tractography method, namely “local”

125 probabilistic streamline tractography, as used by Rafal et al. (2015) to reconstruct the subcortical route to  
126 the amygdala (Rafal et al., 2015). We generated streamlines between our regions of interest (ROIs) and  
127 found that the superior colliculus connected to the pulvinar (streamline counts for left:  $M = 1403.32$ ,  $SD =$   
128  $417.16$ , right:  $M = 111.59$ ,  $SD = 358.60$ , minimum of six streamlines per participant) and the pulvinar  
129 connected to the amygdala (left:  $M = 575.42$ ,  $SD = 203.03$ , right:  $M = 575.42$ ,  $SD = 248.85$ , minimum 66  
130 streamlines per participant). To evaluate whether these streamline counts were reconstructed significantly  
131 above chance, we compared the numbers with those produced by a null distribution algorithm (Morris et  
132 al., 2008). We found that the number of streamlines was significantly different from chance for each  
133 connection, as determined by a series of paired two-sided  $t$ -tests (see **Supplementary Materials, Table 9**),  
134 suggesting that the DWI data produced meaningful streamlines between our ROIs.

135 We employed a recently developed method, SIFT2, which estimates the apparent fibre density of the  
136 streamlines connecting two regions of interest. This method more accurately represents the true underlying  
137 white matter structure (Smith et al., 2015). The apparent fibre density of the streamlines generated using  
138 local tractography followed the same pattern as the global tractography fibre counts, such that there was  
139 greater fibre density for the SC-PUL connection ( $M = 5.793$ ,  $95\% CI = [5.663, 5.923]$ ) than the PUL-AMG  
140 connection ( $M = 4.461$ ,  $95\% CI = [4.368, 4.554]$ ;  $F(1,607) = 69.586$ ,  $p = 4.930 \times 10^{-16}$ ,  $\eta_p^2 = .103$ ), after  
141 accounting for head motion and removing 13 outliers according to their residuals. Fibre density was also  
142 greater on the right ( $M = 4.935$ ,  $95\% CI = [4.822, 5.048]$ ) than the left ( $M = 3.987$ ,  $95\% CI = [3.889, 4.086]$ )  
143 for the PUL-AMG connection ( $t(608) = -18.205$ ,  $p = 1.960 \times 10^{-59}$ ,  $95\% CI [-1.050, -0.845]$ ) while, in  
144 contrast, there was greater fibre density for the left than right SC-PUL connection ( $t(608) = 10.749$ ,  $p =$   
145  $8.600 \times 10^{-25}$ ,  $95\% CI = [0.742, 1.073]$ ;  $F(1,607) = 162.475$ ,  $p = 3.828 \times 10^{-33}$ ,  $\eta_p^2 = .211$ ). Taken together,  
146 our tractography analyses provide strong convergent evidence for a subcortical white matter pathway to the  
147 amygdala in the human brain.

148 Like in the global tractography, we investigated the overlap between the locally-generated tracks and known  
149 white matter fasciculi. The pattern of results was the same, with up to 60% of fibres traversing the anterior  
150 thalamic radiation, corticospinal tract, and inferior longitudinal and fronto-occipital fasciculi. For the SC-  
151 PUL pathway, the majority of track density was found in the anterior thalamic radiation (left:  $M = 52.85\%$ ,  
152  $SD = 11.70\%$ , range = 16.55% to 96.96%; right:  $M = 58.21\%$ ,  $SD = 16.24\%$ , range = 5.49% to 89.30%) and  
153 the corticospinal tract (left:  $M = 12.89\%$ ,  $SD = 8.78\%$ , range = 0.18% to 37.84%; right:  $M = 32.35\%$ ,  $SD =$   
154  $12.49\%$ , range = 0.56% to 63.64%; see **Fig. 1**). For the PUL-AMG pathway, the majority was found in the  
155 corticospinal tract (left:  $M = 32.29\%$ ,  $SD = 15.58\%$ , range = 0.59% to 65.25%; right:  $M = 37.38\%$ ,  $SD =$   
156  $16.21\%$ , range = 0.32% to 65.99%), followed by the anterior thalamic radiation (left:  $M = 16.47\%$ ,  $SD =$

157 9.20%, range = 5.24% to 59.52%; right:  $M = 7.00\%$ ,  $SD = 3.49\%$ , range = 1.46% to 50.09%), and then the  
158 inferior longitudinal (left:  $M = 5.69\%$ ,  $SD = 7.92\%$ , range = 0% to 50.75%; right:  $M = 3.96\%$ ,  $SD = 6.33\%$ ,  
159 range = 0% to 47.51%) and fronto-occipital (left:  $M = 1.54\%$ ,  $SD = 4.21\%$ , range = 0% to 72.79%; right:  $M$   
160 = 7.96%,  $SD = 10.99\%$ , range = 0% to 79.60%) fasciculi. Mean track densities were lower than 0.20% and  
161 0.01% in other fasciculi for SC-PUL and PUL-AMG, respectively. We also examined which subregions of  
162 the pulvinar and amygdala the seeded probabilistic tracks terminated in. For the SC-PUL pathway, the  
163 greatest number of streamlines terminated in the anterior PUL, followed by the inferior pulvinar (see  
164 **Supplementary Materials, Tables 6 to 8** for detailed statistics), consistent with the global tractography.  
165 Also like the global tractography, the local tractography fibres between the PUL and AMG terminated  
166 almost exclusively in the inferior PUL. For the AMG, however, fibres terminated predominantly in the  
167 basolateral subregion in the left hemisphere (consistent with the global tractography) but in the centromedial  
168 amygdala on the right.



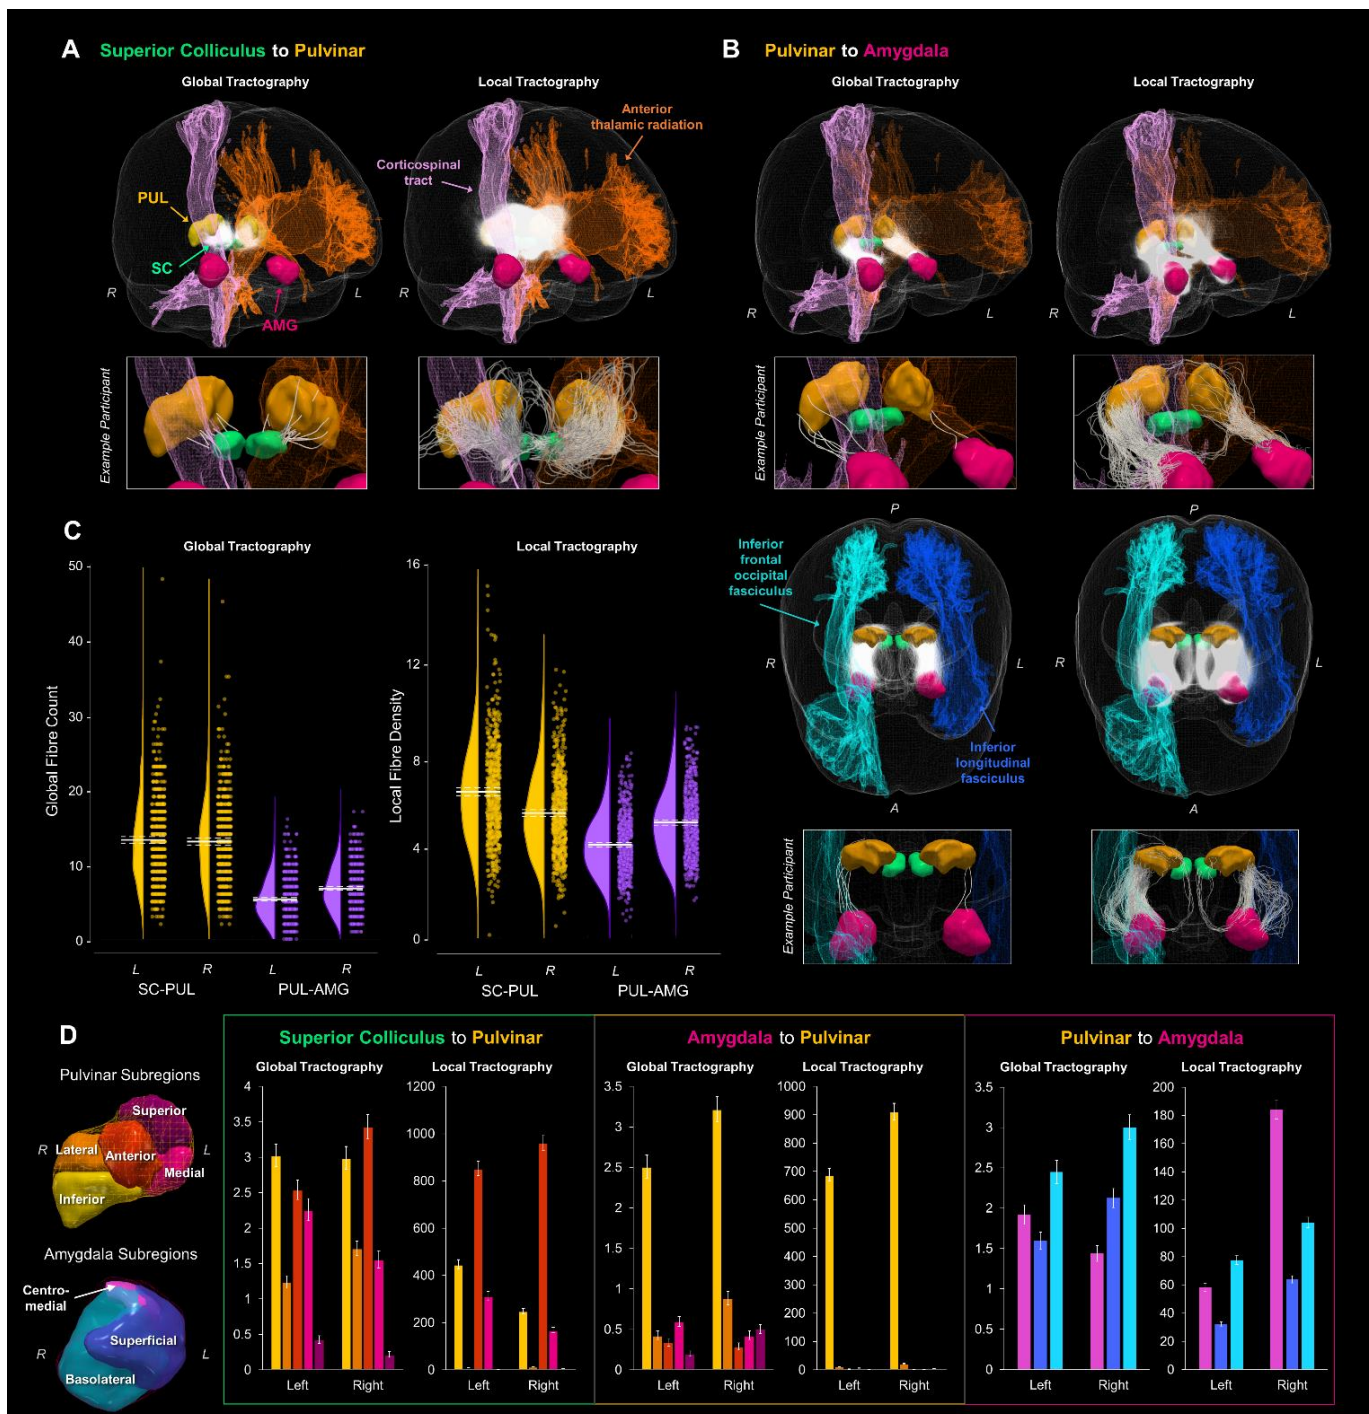

169

170 **Figure 1. Global and local probabilistic tractography reconstructions of the subcortical route to the amygdala.** Fibres  
 171 reconstructed between the superior colliculus and the pulvinar are shown in **A** and between the pulvinar and amygdala in **B**. Both  
 172 **A** and the top row of **B** show 3D-renders of the major ROIs (amygdala in pink, pulvinar in orange, superior colliculus in green),  
 173 as well as the left anterior thalamic radiation (orange) and the right corticospinal tract (pink). The reconstructed fibres for all  
 174 participants are rendered by semi-transparent white streamlines. Streamlines of a single example participant are shown below in  
 175 boxes. The bottom half of **B** shows a different, top-down perspective of the pulvinar to amygdala pathway, illustrating the right  
 176 inferior frontal occipital fasciculus (light blue) and the left inferior longitudinal fasciculus (dark blue). **C** shows the global fibre  
 177 counts (left graph) and average fibre density (right graph) for global and local tractography, respectively (SC-PUL in yellow,

178 PUL-AMG in purple). Group average is indicated by solid white line, with dotted lines indicating the 95% confidence interval.  
179 **D** shows the average number of fibres terminating in each subregion of the pulvinar and amygdala, for both global and local  
180 tractography. 3D renders of the subregions (colour-coded to match the graphs) are shown on the left. Graphs of the number of  
181 fibres terminating in pulvinar subregions are shown for tracts connecting the superior colliculus and pulvinar (first and second  
182 graphs) and the pulvinar and amygdala (third and fourth graphs), while fibres terminating in amygdala subregions are shown for  
183 tracts connecting the pulvinar and amygdala (fifth and sixth graphs). Error bars represent 95% confidence intervals.

## 184 **Greater fibre density predicts better fearful face perception**

185 We wanted to translate our work in humans to animal research that has demonstrated clear relationships  
186 between the anatomical presence of a subcortical route and fearful behaviour (Zhou et al., 2017, Wei et al.,  
187 2015, Shang et al., 2015). To this end, we examined behavioural data from an out-of-scanner task, the Penn  
188 Emotion Recognition task, that assessed a different component of face processing than the in-scanner task  
189 (analysed below). In the Penn Emotion Recognition task, participants were serially presented with 40 faces  
190 that were either happy, sad, angry, fearful, or neutral. Participants were most accurate with identifying the  
191 emotional expression of happy faces ( $M = 7.96$ ,  $SD = 0.21$ ), followed by neutral ( $M = 7.22$ ,  $SD = 1.18$ ), and  
192 then fearful faces ( $M = 7.02$ ,  $SD = 1.03$ ). Recognition was poorest for angry ( $M = 6.86$ ,  $SD = 0.98$ ) and sad  
193 faces ( $M = 6.82$ ,  $SD = 1.12$ ).

194 We then investigated the association between these scores (see **Fig. 2A**) with the fibre density of the  
195 subcortical route. We chose not to include happy or neutral expressions in our analysis because the data  
196 were substantially negatively skewed (skewness for: happy = -5.821; neutral = -2.053; angry = -0.719;  
197 fearful = -1.188; sad = -1.090). Thus, we entered fibre density measures for the SC-PUL and PUL-AMG  
198 pathways into two separate multivariate regressions (one per tractography method, to reduce collinearity)  
199 with recognition accuracy scores for fearful, angry, and sad faces as covariates, plus head motion as a control  
200 covariate. We removed outliers (4 for global tractography, 15 for local tractography) with residuals  $\pm 3$   
201 standard deviations from the mean. While there were no significant multivariate relationships between  
202 global tractography and emotion recognition (see **Supplementary Materials, Tables 10 & 11** for detailed  
203 statistics), there was a significant relationship between local tractography and recognition accuracy for  
204 fearful faces ( $F(4,598) = 2.501$ ,  $p = .042$ , Wilk's  $\Lambda = .984$ ,  $\eta_p^2 = .016$ ; see **Fig. 2B**). This was driven  
205 predominantly by fibre density of the left ( $\beta = 0.140$ ,  $p = .004$ ) and right ( $\beta = 0.143$ ,  $p = .012$ ) PUL-AMG  
206 connections' local fibre density. The local fibre density of the left and right SC-PUL did not contribute  
207 significantly to the model. These results suggest that the fibre density of the PUL-AMG half of the  
208 subcortical route is associated with fearful face recognition more so than with other negative (sad) or  
209 threatening (angry) emotional expressions.



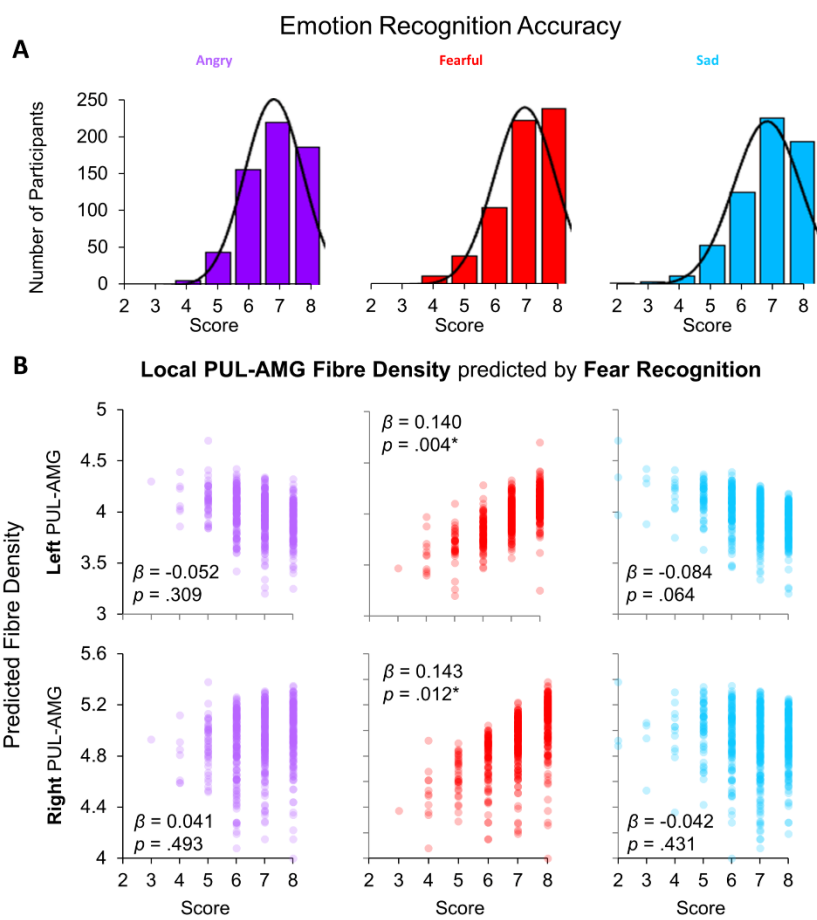

210

211 **Figure 2. Relationship between behavioural performance and tractography.** A) Histograms of scores (out of eight) for  
 212 correctly recognising the emotional expression of angry, fearful, and sad faces from the Penn Recognition Test. Normal  
 213 distribution function is plotted. B) The relationships between recognition of angry (purple), fearful (red), and sad (blue) faces (*x*-  
 214 axes) and the predicted local fibre densities for the left (top row) and right (bottom row) PUL-AMG connection (*y*-axes), as  
 215 produced by a multivariate ANOVA. Fearful face recognition accuracy was significantly related to local fibre density for the left  
 216 and right PUL-AMG connections ( $\beta$  and  $p$  values shown for parameter estimates from multivariate ANOVA, \*  $p < .05$ ).

## 217 Subcortical and cortical BOLD signal to emotional faces

218 We used dynamic causal modelling to infer the dynamic (or effective) connectivity between each node of  
 219 the subcortical route and determine the directionality of the functional interactions occurring along the  
 220 anatomical pathway mapping described above. First, it was necessary to establish any differences in  
 221 functional activation within these nodes. To do this, we used the "Emotion" task from the HCP battery of  
 222 fMRI experiments, in which participants performed a matching task using images of faces or shapes. We  
 223 contrasted activation in face versus shape blocks and reviewed the results at the whole-brain group level  
 224 across all 622 participants,  $p < .05$  FWE (see **Fig. 3**). This revealed a network of significant BOLD clusters  
 225 spread across occipital, temporal, frontal, parietal, and subcortical areas, replicating previous work with this

226 dataset (Barch et al., 2013). Critically, the most significant cluster included the left and right amygdala as  
227 well as the left and right fusiform gyri (FG) and inferior occipital gyri (IOG). These latter two regions are  
228 key nodes in the cortical visual processing stream for faces, which may feed information forward to the  
229 amygdala (Tamietto and de Gelder, 2010).

230 We used the SPM Anatomy Toolbox to confirm the anatomical positions of our functional activations. In  
231 the absence of an anatomical template for the superior colliculus and the pulvinar, we masked the map of  
232 statistically significant voxels ( $p < .05$ , FWE) with our *a priori* manual anatomically-defined superior  
233 colliculi mask and functionally-defined pulvinar masks from Barron et al. (2015; see **Online Methods** for  
234 ROI generation). This revealed significant voxels in each area (proportion of significant voxels within each  
235 mask: left SC = 65.08%, right SC = 73.55%, left PUL = 36.13%, right PUL = 51.49%). Therefore, the faces-  
236 vs-shapes fMRI HCP task established functional activation in the three subcortical nodes of interest, as well  
237 as two nodes of a potential cortical pathway to the amygdala for conveying information about emotional  
238 faces.

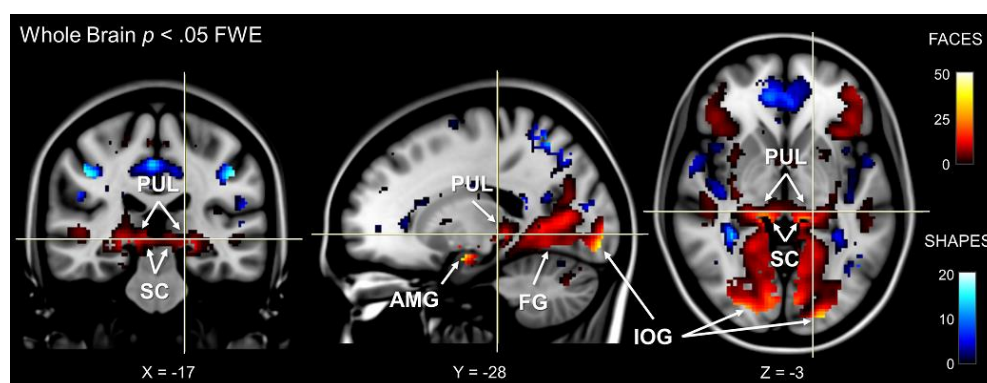

239  
240 **Figure 3. Whole-brain fMRI activation for faces and shapes.** Face activation is shown by hot colours and shape activation is  
241 shown by cool colours. MNI coordinates are shown at the bottom. Labels indicate significant ( $p < .05$ , whole brain FWE)  
242 activation in the superior colliculus (SC), pulvinar (PUL), amygdala (AMG), inferior occipital gyrus (IOG), and fusiform gyrus  
243 (FG). Results are overlaid on an averaged MNI152 T1 template.

## 244 **A forwards-only subcortical route is engaged during face processing**

245 After observing significant BOLD signal in regions along the subcortical route as well as in other visual  
246 cortical areas, we next asked whether these regions were dynamically connected. We designed a space of  
247 testable models that mapped onto the functional hypothesis of a subcortical route to the amygdala that  
248 operates alongside a cortical visual pathway and is modulated by faces. Due to the presence of the IOG and  
249 FG in the whole-brain correct fMRI activation and their known roles in face processing (Johnson, 2005),  
250 we defined several plausible functional cortical connections to the amygdala. These consisted of reciprocal

251 pathways between IOG and FG, FG and amygdala, IOG and amygdala, as well as pulvinar and IOG (see  
252 **Fig. 4**). Note that, while previous research has defined motion-related area V5/MT as a significant  
253 component of the pulvinar's subcortical visual network (Zhou et al., 2017), we did not observe strong  
254 involvement of this area in the faces-vs-shapes fMRI task (12% probability in cluster 37 with 2 voxels).  
255 Hence, we omitted area V5/MT from our model space. We named models containing both a cortical and  
256 subcortical route to the amygdala as "Dual" models, whereas models in which the subcortical route was  
257 absent were named "Cortical". Our model space also included different sources of visual input, namely to  
258 the superior colliculus, pulvinar, or both, given that the pulvinar also receives direct retinal input (Cowey et  
259 al., 1994) as well as input via the superior colliculus (Berman and Wurtz, 2011). This gave us six families  
260 of models: 1) Cortical with SC input, 2) Cortical with PUL input, 3) Cortical with SC and PUL input, 4)  
261 Dual with SC input, 5) Dual with PUL input, and 6) Dual with SC and PUL input. We considered all possible  
262 combinations of forwards and reciprocal (forwards and backwards) cortical and subcortical connections,  
263 giving us a comprehensive model space of 102 models.

264 Of the available 622 participants, we conducted dynamic causal modelling on a subset of 237 participants  
265 who had sufficient above-threshold activation in all ROIs (these were defined by the subcortical masks used  
266 thus far and by spheres surrounding the coordinate of peak group BOLD signal in the IOG and FG; see  
267 **Online Methods** for more details). We conducted Bayesian model selection on the model space (grouped  
268 by families) to estimate how well the models explained the data, taking into account model complexity. We  
269 used the random effects implementation to account for potential individual differences in the recruitment of  
270 a subcortical pathway for viewing faces (Stephan et al., 2009). The winning family was the "Dual with SC  
271 and PUL input" family (expected probability = 67.34%, exceedance probability = 100%) and the winning  
272 model across the entire model space was also within this family (expected probability = 21.24%, exceedance  
273 probability = 98.01%, protected exceedance probability = 98.18%; see **Fig. 4**). This model included  
274 reciprocal cortical connections between IOG and FG and between FG and the amygdala. It also included a  
275 forwards-only subcortical route from the superior colliculus to the pulvinar to the amygdala, with input to  
276 both the superior colliculus and the pulvinar. The Bayesian Omnibus Risk score was  $P = 1.78 \times 10^{-124}$ ,  
277 indicating a very small chance that the winning model was indistinguishable from all models tested (Rigoux  
278 et al., 2014). We replicated this finding (same winning family and winning model) on a subsample  
279 consisting of only the unrelated (i.e. non-sibling) participants within this group (49 participants; see  
280 **Supplementary materials**).

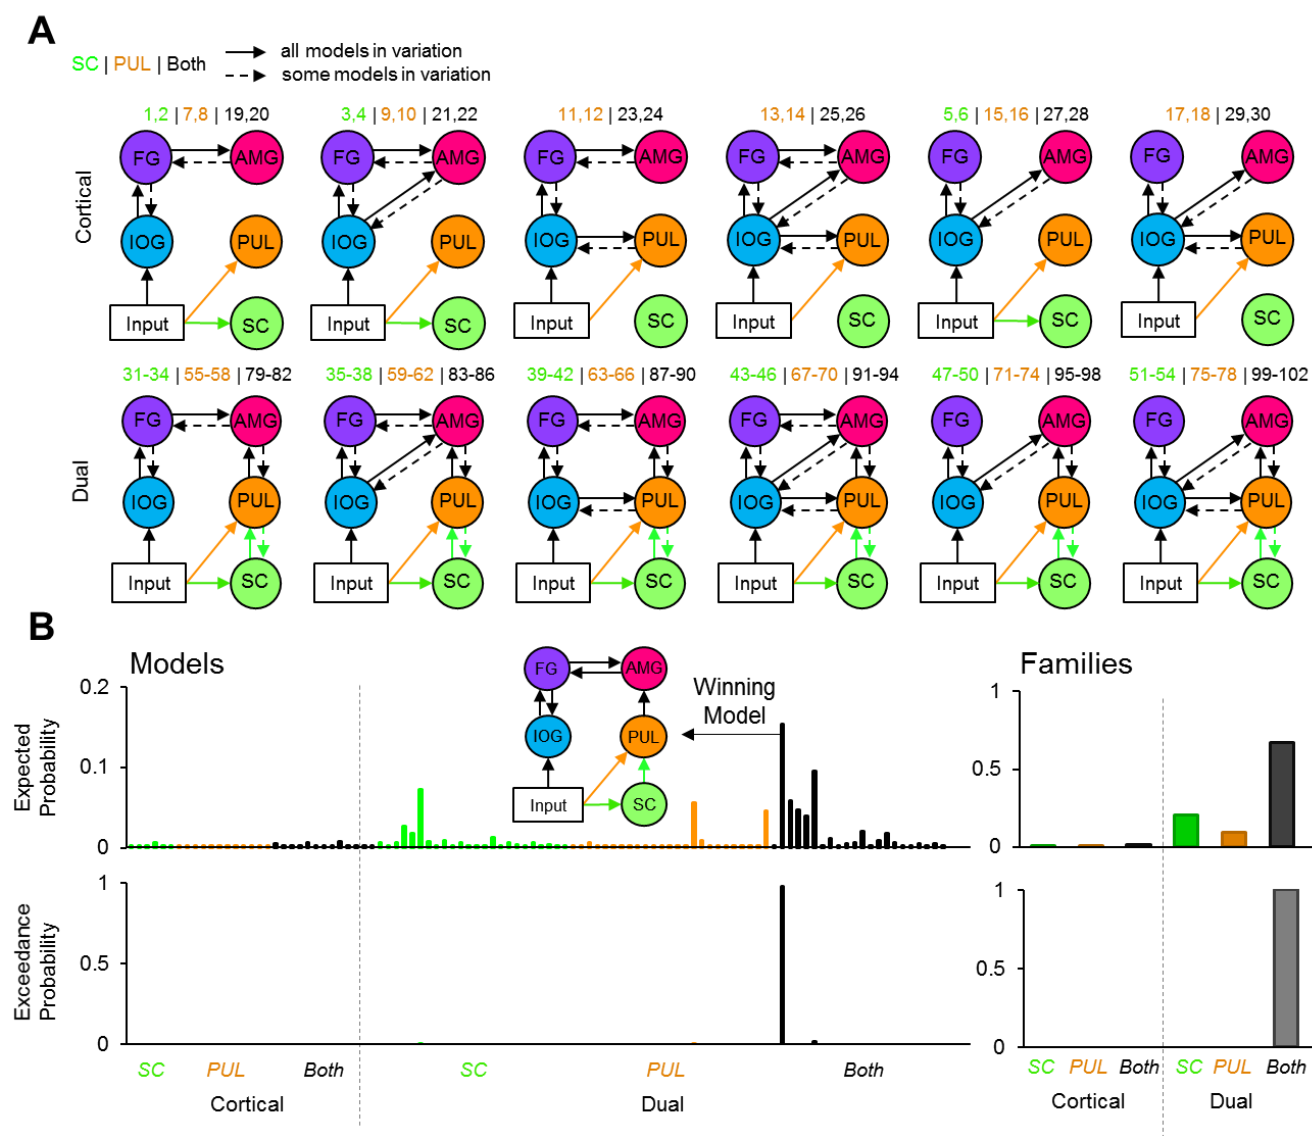

281

282 **Figure 4. Dynamic causal modelling model space and estimated probabilities.** A) Diagram of the model space constructed  
 283 for the fMRI activation to viewing faces. The top row shows various types of model designs in the Cortical family, and the bottom  
 284 row shows model designs in the Dual family (which includes a subcortical route). Each model variation included different  
 285 combinations of forwards and backwards connections, indicated by dashed arrows. The model numbers are shown above each  
 286 model variation. Every model contained input to the inferior occipital gyrus but some models also contained input to the superior  
 287 colliculus (green) only, pulvinar (orange) only, or both (black). B) The expected (top row) probabilities and exceedance  
 288 probabilities (bottom row) for each of the 102 models. The colour of the bars indicates the different type of input for that family  
 289 (i.e., SC, PUL, or both), according to A). Individual model probabilities are shown on the left (including a diagram of the winning  
 290 model) and the probabilities for the families are shown on the right.

291 The winning model revealed that the functional network that best explained the BOLD responses in our  
 292 sample of 237 participants included visual inputs to the superior colliculus and pulvinar, forward  
 293 connections from superior colliculus to the amygdala via the pulvinar, and recurrent interactions between

294 IOG and FG, as well as between FG and amygdala. To extrapolate this finding to the general population  
295 and assess the consistency of dynamic coupling at each individual connection, we performed inferential  
296 statistics (*t*-tests) on the parameter estimates of each connection within the winning model (i.e. connectivity  
297 strength, in their natural space). We looked at the connectivity modulation parameters that represent the  
298 change in connection strength caused by the effect of faces. We removed extreme outliers (>3 SDs from  
299 mean) participants from each connection ( $M = 5.25$ , range = 3 to 8 participants excluded from sample of  
300 237) and found that all connectivity modulations were significant (one sample *t*-tests against a test value of  
301 1; see **Supplementary Materials Table 13** for detailed statistics) except for the backward connection from  
302 left and right FG to left IOG (see **Fig. 5**). These results suggest that the modulation of these connections by  
303 faces was consistently strong and so we can infer that a subcortical route for processing faces is likely  
304 present within the general population.



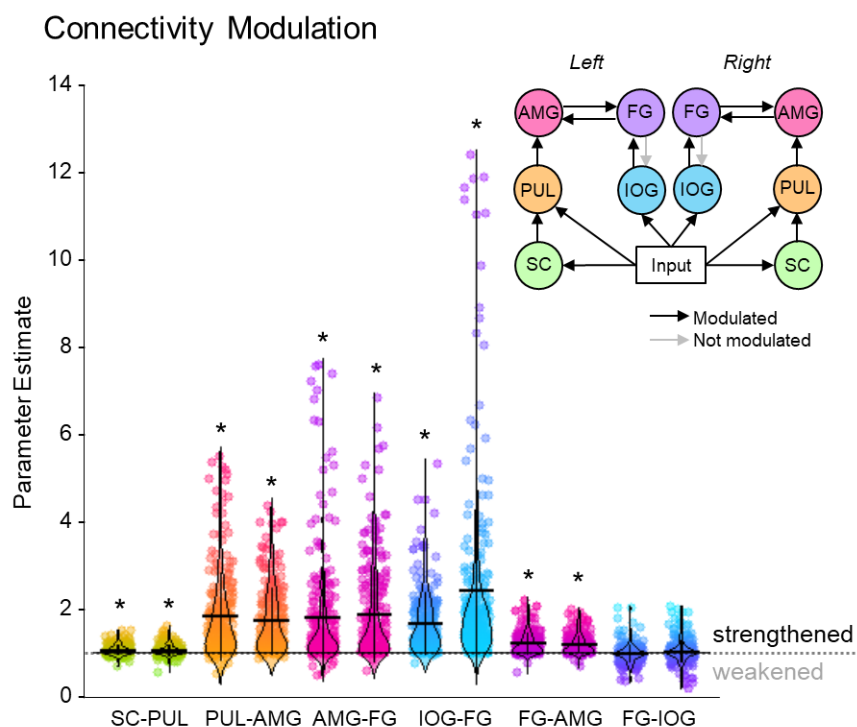

305

306

307

308

309

310

311

**Figure 5. The strength of individual connections from the winning dynamic causal model.** Parameter estimates of the modulatory connection strength of the winning model. Dot plots of up to 234 participants are shown with horizontal lines for the mean and vertical lines for one standard deviation. Density distribution is represented by each violin plot. The long horizontal dotted line across the graph represents the prior (set to 1), where \* indicates the connection was significantly greater than 1 ( $p < .05$ , corrected for multiple comparisons). A diagram of the winning model (left and right hemispheres are shown) is at the top right. Greyed-out connections indicate those that were not significant.

312

## Greater fibre density relates to stronger effective connectivity

313

314

315

316

317

318

319

320

321

322

323

324

Our findings from tractography, fMRI, and dynamic causal modelling provide convergent evidence for a subcortical route to the amygdala in humans. The final question we set out to answer was whether this converging evidence was correlated, such that participants with stronger structural connectivity also had stronger effective connectivity. In other words, we asked whether the structural connectivity along the subcortical amygdala route enables functional interactions amongst the nodes that lie within it. We computed eight partial correlations (with head motion as a control covariate) to examine the relationship between each parameter estimate and the corresponding global fibre count and local summed weights per connection (left and right SC-PUL and PUL-AMG). After removing multivariate outliers (leaving  $N = 213$ ; see **Supplementary Materials, Table 12** for details), we discovered that participants with more global fibres also had greater modulatory activity for the right ( $r = .180$ ,  $p = .004$ ,  $p_{\text{bonf}} = .032$ ; see **Fig. 6**) but not the left ( $r = .095$ ,  $p = .084$ ,  $p_{\text{bonf}} = .672$ ) PUL-AMG connection. The SC-PUL connection was not significantly related to its corresponding DCM parameters for global (left:  $r = -.022$ ,  $p = .627$ ,  $p_{\text{bonf}} = 1.000$ ;

325 right:  $r = .002$ ,  $p = .488$ ,  $p_{bonf} = 1.000$ ) or local (left:  $r = -0.101$ ,  $p = .928$ ,  $p_{bonf} = 1.000$ ; right:  $r = -.028$ ,  $p =$   
326  $.659$ ,  $p_{bonf} = 1.000$ ) tractography. Note that we successfully replicated this finding within a subsample of  
327 unrelated participants (49 participants; see **Supplementary Materials**). Thus, our study is the first to  
328 successfully harmonise functional and structural information about the subcortical pulvinar connection to  
329 the amygdala.

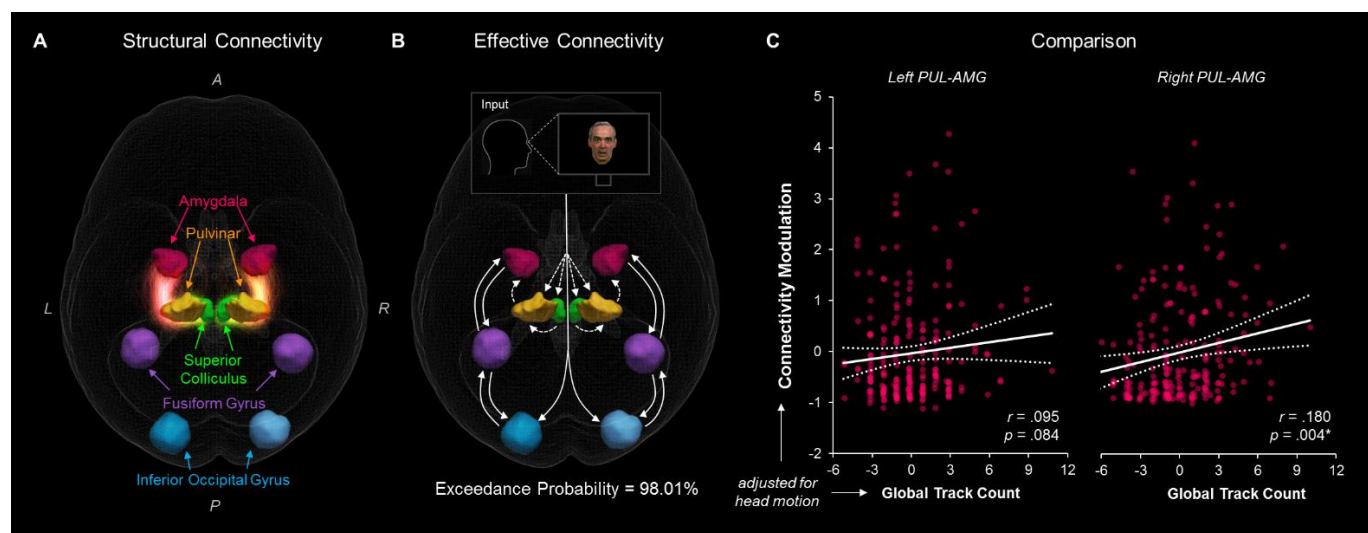

330

331 **Figure 6. The relationship between structural and effective connectivity for the subcortical route.** A and B show 3D renders  
332 of the ROIs used in the dynamic causal modelling stage. A = anterior, P = posterior, R = right, L = left. **A)** 3D-rendered tracks  
333 generated by global tractography overlaid for all 622 participants (pink/orange for PUL-AMG, green/yellow for SC-PUL). **B)**  
334 direction of information flow according to the winning dynamic causal model (exceedance probability = 98.01%) illustrated using  
335 an axial view of the network. Dotted lines indicate subcortical input/connections. **C)** positive correlation between global track count  
336 count for the left and right PUL-AMG connections and the modulatory strength of the same connection in the winning effective  
337 connectivity model (with 95% CI shown).

## 338 DISCUSSION

339 The elusive subcortical route to the amygdala has posed a unique challenge in studies of the human brain,  
340 due to its depth and its fast activation. Evidence has accumulated over recent years across many studies  
341 using various neuroimaging modalities showing that this pathway may underlie primitive threat-related  
342 behaviour. These studies, however, often take a unimodal approach on typically small samples, making it  
343 difficult to relate the specific structural connections between superior colliculus, pulvinar, and amygdala to  
344 observed functional brain activity and behavioural output. Our study, which used a large sample of  
345 participants from the HCP, supports the existence of a subcortical pulvinar connection to the amygdala in  
346 the healthy human adult brain that facilitates dynamic coupling between these regions and also enhances

347 fear recognition. We reconstructed the subcortical route to the amygdala using sophisticated tractography  
348 methods and found that the white matter fibre density of the pulvinar-amygdala connection significantly  
349 predicted individuals' ability to recognise fearful faces. We then computationally modelled the functional  
350 neural networks along this structurally connected network that were engaged while people viewed emotional  
351 faces. We found that it was more likely for the network to include a subcortical visual route to the amygdala  
352 than a cortical route alone. Finally, we revealed converging evidence from structural and effectivity  
353 connectivity, such that the fibre density of the right pulvinar to amygdala pathway was positively correlated  
354 with the strength of the dynamic coupling (i.e. effective connectivity) between these regions.

355 This study marks the first time that structural and effective connectivity have been concurrently investigated  
356 in the one large sample to address the controversy on the existence and functional role of the putative  
357 subcortical route to the amygdala. Up to 60% of its fibre density overlapped with major fasciculi, including  
358 the corticospinal tract, anterior thalamic radiation, inferior longitudinal fasciculus, and inferior fronto-  
359 occipital fasciculus. Tractography of diffusion images is susceptible to both false positives and false  
360 negatives and thus is seldom used in isolation to determine the existence of particular neuroanatomical  
361 pathways (Jbabdi and Johansen-Berg, 2011). We established the validity of our tractographically-  
362 reconstructed subcortical route by directly relating our measures of fibre density to both behaviour and  
363 effective connectivity, as well as by using two different tractography methods. Had the fibre density  
364 measures been simply due to noise, we would not have expected these theoretically relevant relationships  
365 with fearful face processing to emerge within this large sample of individuals. Notably, these intermodal  
366 relationships were only found for the pulvinar-amygdala connection, despite there being greater fibre  
367 density between the superior colliculus and the pulvinar and this connection being present in the winning  
368 dynamic causal model. One explanation for this is that we had relatively less BOLD signal-to-noise ratio in  
369 the superior colliculus due to its small size and proximity to major blood vessels in the brain stem (Wall et  
370 al., 2009), thus weakening the likelihood of finding consistent covariance of its functional coupling with  
371 fibre density. Another explanation, particularly regarding the behaviour-tractography relationship, is that  
372 the pulvinar plays a significant functional role in the subcortical route to the amygdala. Research on  
373 macaques has demonstrated the pulvinar's response to emotional faces (Soares et al., 2017, Maior et al.,  
374 2010) and its role in modulating attention (Soares et al., 2017) and so we would indeed expect the strength  
375 of the pulvinar-amygdala connection to be more predictive of fearful face recognition. Future research could  
376 more deeply investigate the relative contribution of each half of the subcortical route to emotional face  
377 processing by using an optimised fMRI approach (Wall et al., 2009) and contrasting different types of

378 stimuli – for example, low vs. high spatial frequency (Gomes et al., 2017) or moving stimuli (Berman and  
379 Wurtz, 2010).

380 Our decision to reconstruct the two halves of the subcortical route separately was motivated by our interest  
381 in the relative contribution of each connection to face-related processing (as described above) but was also  
382 a limitation imposed by anatomically-constrained tractography, where fibres terminate at boundaries  
383 between grey and white matter (Smith et al., 2012). Given that the pulvinar is made up of thalamic cell  
384 bodies (grey matter), the likelihood of reconstructing a continuous streamline of axon bundles *traversing*  
385 the pulvinar's grey matter may have been restricted by these boundary constraints. Previous studies that  
386 have not imposed these constraints have successfully traced a continuous pathway from the superior  
387 colliculus to the amygdala via the pulvinar (Rafal et al., 2015; Tamietto et al., 2012), supporting animal  
388 research showing that inferior-lateral pulvinar neurons receiving superior colliculus afferents also have  
389 efferent connections to the lateral amygdala (Day-Brown et al., 2010). Our investigation into pulvinar and  
390 amygdala subregions support these findings, such that we found the superior colliculus to project  
391 predominantly onto the inferior (and anterior) pulvinar, which was the same subregion to receive the vast  
392 majority of fibres from the amygdala (see **Fig. 1**). Furthermore, pulvinar fibres terminated predominantly  
393 within the basolateral amygdala, which is known to process visual information about threat and faces  
394 (Hortensius et al., 2016). Further studies could use both anatomically-constrained tractography and this  
395 subregion-specific approach with ultra-high-resolution imaging to better differentiate grey-white matter  
396 boundaries and more accurately determine if and where a continuous, subcortical route might traverse the  
397 pulvinar.

398 While our results suggest that the inferior pulvinar may serve as a disynaptic connection point between the  
399 superior colliculus and amygdala, the continuity of information flow along the subcortical route is still a  
400 disputed feature due to the strong cortical influences on the pulvinar (Bridge et al., 2016; Pessoa and  
401 Adolphs, 2011). This dispute has also arisen from prior work investigating the spatial frequency content of  
402 information conveyed along the subcortical route. Research on blindsight patients has found evidence only  
403 for low spatial frequencies which suggests that such information originated from magnocellular cells in the  
404 superior colliculus (Burra et al., 2018; Méndez-Bertolo et al., 2017). On the other hand, work in healthy  
405 participants has found no such spatial frequency preference, which suggests that rapid pulvinar-amygdala  
406 transmission might include input from other parvocellular pathways (McFadyen et al., 2017). We did not  
407 exhaustively explore the extent to which the cortex contributes information to the pulvinar-amygdala  
408 connection. The winning effective connectivity model, however, did not include cortical connections  
409 between the pulvinar and the inferior occipital gyrus. Hence, it is unlikely that the primary visual cortex

410 contributed (either via direct anatomical connections or functional coupling along the ventral visual stream  
411 (Pessoa and Adolphs, 2010) to the information transmitted along the subcortical route. The winning model  
412 did, however, include input to the superior colliculus as well as directly to the pulvinar, which could reflect  
413 direct retinal input or input from areas not explicitly included in the model, such as the (e.g. parietal cortex,  
414 temporal cortex, or the LGN; Bridge et al. 2016), that may transmit both low and high spatial frequency  
415 information. Furthermore, it remains to be shown how interactions between the pulvinar and other cortical  
416 areas, such as the inferotemporal cortex (Zhou et al., 2016), may directly influence activity along the  
417 pulvinar-amygdala connection.

418 Our findings open avenues for future studies on how this subcortical pathway might influence threat-related  
419 behaviour. While our findings demonstrated that greater pulvinar-amygdala fibre density related to better  
420 fearful face recognition, it remains to be seen how this might compare with structural connectivity of other  
421 cortical networks. In other words, would the fibre density of this subcortical connection explain fearful face  
422 recognition above and beyond, say, structural connections between the inferior temporal or orbitofrontal  
423 cortex and the amygdala (Pessoa and Adolphs, 2011) or between the thalamus and the superior temporal  
424 sulcus (Leppänen and Nelson, 2009)? Evidence from blindsight patients suggests that this subcortical  
425 connection ensures redundancy and compensation, such that it strengthens when cortical connections are  
426 destroyed (Tamietto et al., 2012). Taking this in conjunction with our findings, we might consider that the  
427 pulvinar-amygdala connection contributes to fear recognition in faces (and effective connectivity underlying  
428 face perception) in healthy participants but can increase or decrease its influence depending on the  
429 functioning of other networks. Such increases and decreases are already evident in certain clinical  
430 populations. For example, structural connectivity between the superior colliculus, pulvinar, and amygdala  
431 is weakened in individuals with autism compared to healthy controls (Hu et al., 2017), and BOLD signal to  
432 fearful faces is reduced in these areas (Kleinhans et al., 2011; Green et al., 2017), unless participants are  
433 explicitly instructed to fixate on the eyes (Hadjikhani et al., 2017). On the other hand, people who suffer  
434 from anxiety show hyperactive activity along the subcortical route compared to non-anxious individuals  
435 (Hakamata et al., 2016; Tadayonnejad et al., 2016; Nakataki et al., 2017). How and why this subcortical  
436 visual pathway to the amygdala is altered in these clinical populations remains a significant and relatively  
437 unexplored avenue of research.

438 We observed hemispheric lateralisation of the pulvinar-amygdala connection, such that both the local and  
439 global tractography showed greater fibre density along the right than the left, and there were stronger  
440 tractography-behaviour and tractography-connectivity relationships for the right than the left. Early studies  
441 on the subcortical route observed specifically right-sided BOLD responses during non-conscious fearful



442 face viewing (Morris et al., 1999; Morris et al., 1998), and a previous tractography study has also found that  
443 only the fractional anisotropy of the right subcortical route was significantly related to threat-biased (Koller  
444 et al., 2018). There is mounting evidence for right-sided specialisation for ordered (Wyczesany et al., 2018)  
445 and disordered (McDonald, 2017) emotion processing, particularly for non-conscious signals transmitted  
446 along the subcortical route (Gainotti, 2012). Thus, our results lend support to this theory by demonstrating  
447 evidence for the right pulvinar-amygdala connection's stronger fibre density and its relationship to  
448 emotional face viewing and fearful face recognition. Our understanding of this lateralisation may be  
449 deepened by future exploration of left- vs. right-sided structural connectivity and function along the  
450 subcortical route during conscious vs. non-conscious emotion processing in healthy participants.

451 One limitation of the present study is the discrepancy between how local and global measures of fibre  
452 density related to other measures; namely, that local tractography covaried with fearful face recognition  
453 scores while global tractography covaried with effective connectivity. While the reconstructed fibres shared  
454 many similarities (e.g. the pattern of findings for each connection across hemispheres and subregions, as  
455 well as the overlap with major fasciculi; see **Fig. 1**) even after accounting for head motion, it is possible that  
456 the local tractography's relatively greater susceptibility to noise may have decreased its relationship to  
457 corresponding effective connectivity parameters. Indeed, global tractography has been shown to better  
458 reflect local connection architecture (Jbabdi and Johansen-Berg, 2011), such as the subcortical connections  
459 we have investigated. Such discrepancies between global and local tractography have been reported in other  
460 studies (Anastasopoulos et al., 2014) and so further research (particularly those that only recruit a single  
461 tractography method) will benefit from specific investigations into why these discrepancies might arise.

462 In conclusion, our study has made substantial progress towards settling the long-held debate over the  
463 existence and function of a subcortical route to the amygdala in the human brain. Our multimodal  
464 neuroimaging approach, leveraged by computational modelling, provides convergent evidence for a  
465 fundamental and conserved pulvinar-amygdala pathway that is specifically involved in fear. We  
466 demonstrate that the white matter tracts that form the subcortical structural pathway from the pulvinar to  
467 the amygdala enables functional, dynamic interactions involved in emotional face perception. Critically, we  
468 show that structural connectivity between the pulvinar and the amygdala leads to better recognition of  
469 fearful expressions.

## 470 **ONLINE METHODS**

### 471 **Participants**

472 We used the data from the publicly available Human Connectome Project (HCP) S900 release, collected  
473 between 2012 and 2016, containing data from 897 consenting adults (Van Essen et al., 2013). Ethical  
474 permission to use this data and the associated restricted access data (including variables such as specific age  
475 information) was obtained from the University of Queensland Human Research Ethics Committee. Out of  
476 these participants, 730 young adults had complete MRI and dMRI data, as well as fMRI data for the faces-  
477 vs-shapes task (Van Essen et al., 2012). Of these, we excluded 95 people due to positive drug/alcohol tests  
478 and an additional 13 for abnormal colour vision. This resulted in a final sample of 622 participants aged  
479 between 22 and 36 years ( $M = 28.81$ ,  $SD = 3.68$  years), 259 of whom were male and 363 female, with 569  
480 right-handed and 53 left-handed. Within our sample, 495 participants were related to one or more other  
481 participants (328 families in total). This included 53 pairs of monozygotic twins, 50 pairs of dizygotic twins,  
482 and 289 participants with one or more non-twin siblings in the sample. The remaining 127 participants were  
483 unrelated. We acknowledged that the many siblings in the HCP sample might spuriously decrease the  
484 variance in our neural measures (due to the structural and functional similarity between siblings, for  
485 example) and thus influence our statistics. Because of this, we replicated some of the analyses from the full  
486 sample on the subsample of unrelated participants (see **Supplementary Materials**).

### 487 **dMRI Processing**

#### 488 **dMRI Acquisition**

489 The HCP scanned participants in sessions over two days using a custom-made Siemens 3T “Connectome  
490 Skyra” (Siemens, Erlangen, Germany) with a 32-channel head coil, located at Washington University, St  
491 Louis, USA. They collected two separate T1-weighted high-resolution MPRAGE images (voxel size =  
492 0.7mm isotropic, field of view = 224mm, matrix = 320, 256 sagittal slices,  $TR = 2,400\text{ms}$ ,  $TE = 2.14\text{ms}$ ,  
493  $TI = 1,000\text{ms}$ , flip angle =  $8^\circ$ , bandwidth = 210Hz per pixel, echo spacing = 7.6ms). We only used the first  
494 T1 image of the two sessions in our analysis. The HCP collected multi-band multi-shell diffusion-weighted  
495 images in a single session also using the Connectome Skyra (3 shells with b-values of 1000, 2000, and 3000  
496  $\text{s/mm}^2$ ; 90 directions per shell; voxel size = 1.25mm isotropic;  $TR = 5520\text{ms}$ ;  $TE = 89.5\text{ms}$ ; flip angle =  
497  $78^\circ$ ; field of view = 210 x 180mm; refocusing flip angle =  $160^\circ$ ; echo spacing = 0.78ms; bandwidth = 1488  
498 Hz/pixel; slice thickness = 111 x 1.25mm).

## 499 dMRI Preprocessing

500 We used the minimally processed images provided by the HCP. For the T1 images, this included gradient  
501 distortion correction, bias field correction (using FSL: Jenkinson, Beckmann, Behrens, Woolrich, and  
502 Smith, 2012; <http://fsl.fmrib.ox.ac.uk/fsl/fslwiki/>), and cortical segmentation (using FreeSurfer: Dale,  
503 Fischl, and Sereno, 1999; <http://surfer.nmr.mgh.harvard.edu/>). For the diffusion images, this included  
504 intensity normalisation across runs, echo planar imaging (EPI) distortion correction and eddy current/motion  
505 correction (for full details, see Glasser et al. 2013). The latter stage produced motion parameters (three  
506 translations and three rotations), across which we computed the mean relative displacement between dMRI  
507 volumes. These values per participant were used in all further analyses to account for any confounding  
508 effect of motion (Baum et al., 2018). We conducted all further processing using MRTrix 3.0.15 (Tournier  
509 et al., 2012) and FSL 5.0.7.

## 510 Global Intensity Normalisation

511 First, we corrected for low-frequency B1 field inhomogeneities in the dMRI volumes. We then conducted  
512 global intensity normalisation across each participant's corrected diffusion-weighted image so that we could  
513 later perform quantitative analyses of fibre density (i.e. apparent fibre density; Raffelt et al., 2012). This  
514 step normalises the median white matter  $b=0$  intensity (i.e. non-diffusion-weighted image) across  
515 participants so that the proportion of one tissue type within a voxel does not influence the diffusion-weighted  
516 signal in another. Given our large sample size, we selected a subset of 62 participants (approximately 10%  
517 of the sample) to create a representative fractional anisotropy (FA) population template and white matter  
518 mask. We then used the population template and white matter mask to normalise the white matter intensity  
519 of all 622 participants' dMRI volumes.

## 520 Response Function Estimation

521 We segmented each participant's T1 image into five tissue types (cortical grey matter, subcortical grey  
522 matter, white matter, CSF, and pathological tissue) using the Freesurfer parcellation image provided by the  
523 HCP. We then estimated response functions (i.e. the signal expected for a voxel containing a single,  
524 coherently-oriented fibre bundle) for grey matter, white matter, and CSF using the Multi-Shell Multi-Tissue  
525 (MSMT) Constrained Spherical Deconvolution (CSD) algorithm (Jeurissen et al., 2014). After completing  
526 this step for all participants, we averaged their response functions to produce representative response  
527 functions per tissue type. We then conducted MSMT CSD on each participant again using the group  
528 averaged response functions, producing individual multi-tissue fibre orientation distributions (FODs).

## 529 **fMRI Processing**

### 530 **fMRI Acquisition**

531 As with the dMRI data, the HCP acquired whole-brain gradient-echo echo planar imaging (EPI) data using  
532 the Connectome Skyra (TR = 720ms, TE = 33.1ms, flip angle = 52°, bandwidth = 2,290 Hz/Px, in-plane  
533 field of view = 208 x 180mm, 72 slices at 2mm thick, voxel size = 2mm isotropic, echo spacing = 0.58ms)  
534 with a multiband factor of eight. They collected data in a one-hour session (either on the same day as the  
535 dMRI or one day before/after) along with two or three other functional tasks in the HCP battery. For the  
536 faces-vs-shapes task, there were two runs, one with right-to-left phase encoding and the other with left-to-  
537 right phase encoding, each with 176 frames at a duration of 2 minutes and 16 seconds.

### 538 **fMRI Task**

539 The HCP developed the "emotion task" (i.e. faces vs. shapes) from the paradigm presented by Hariri et al.  
540 (2002). Participants were presented with three visual stimuli at a time (one image at the top and two at the  
541 bottom) using E-Prime (Schneider et al., 2002). Participants were then instructed to make a button press  
542 indicating which of the two images at the bottom (left or right) matched the image at the top. Images were  
543 either a face (angry or fearful) or a shape (circle, horizontal oval, or vertical oval). The stimuli were  
544 presented on screen for 2,000ms separated by a 1,000ms inter-stimulus interval. A cue was presented at the  
545 beginning of each block to indicate the block type (i.e. "shape" or "face"), where each block contained either  
546 6 faces trials or 6 shapes trials. Finally, a fixation cross was presented for eight seconds at the end of each  
547 of each run. The last block of each run only contained the first three trials due to a technical error that  
548 occurred early in HCP data collection. As the first block was always a shape block, our analysis was  
549 conducted on three shape blocks and 2.5 face blocks.

### 550 **fMRI Preprocessing**

551 We used the minimally preprocessed fMRI data provided by the HCP corrected for gradient distortion,  
552 motion, and field map-based EPI distortion. The HCP intensity normalised the data and spatially  
553 transformed it to MNI152 space using FSL (see Glasser et al. 2013 for full details on preprocessing pipeline).  
554 We further increased the signal-to-noise ratio of the fMRI data in SPM12 (SPM12,  
555 [www.fil.ion.ucl.ac.uk/spm](http://www.fil.ion.ucl.ac.uk/spm)) by applying spatial smoothing using a 4mm Gaussian kernel (Hillebrandt et al.,  
556 2014).

## 557 **Regions of Interest**

558 We chose the superior colliculus, pulvinar, and amygdala as our ROIs. We created masks of these ROIs in  
559 standard MNI space using FSL. For the amygdala (AMG) binary mask, we used the probabilistic Harvard-  
560 Oxford Subcortical atlas at a threshold of at least 50% probability. For amygdala subregions, we used the  
561 basolateral, centromedial, and superficial amygdala regions in the Juelich Histological Atlas (Amunts et al.,  
562 2005) at a threshold of at least 40% probability. For the pulvinar (PUL), we were interested in the structure  
563 as a whole, as well as its subregions (results for the latter are detailed in **Supplementary Materials**). To do  
564 this, we used the parcellated pulvinar mask generated by Baron et al. (2015), who isolated five distinct  
565 pulvinar clusters based on functional co-activation profiles in fMRI data from 29,597 participants across  
566 7,772 experiments (Barron et al., 2015). For the pulvinar as a whole ROI, we merged the five clusters  
567 together and used FSL to manually fill any holes in the resultant binary mask. Finally, we manually created  
568 binary masks for the left and right superior colliculi (SC) in the absence of an atlas-based mask by drawing  
569 the boundaries of the superior colliculus over the MNI152 single participant T1 template with reference to  
570 an anatomical atlas (Tamraz and Comair, 2004) and filling the centre. We then used FSL to warp these  
571 masks into native diffusion space for each participant's tractography analysis. All our ROIs in MNI space  
572 are freely available online from the Open Science Framework: [doi:10.17605/OSF.IO/KBPWM](https://doi.org/10.17605/OSF.IO/KBPWM).

## 573 **dMRI analysis**

574 In this study, we implemented two tractography methods that use different approaches to white matter  
575 reconstruction for cross-method validation. We first used the multi-tissue model of global tractography.  
576 This method takes a Bayesian approach to reconstructing a full-brain fibre configuration using a generative  
577 signal model to best explain the underlying data. It is less sensitive to noise that may accumulate for longer  
578 distance tracts in other “local” tractography methods throughout their stepwise approach (Christiaens et al.,  
579 2015, Reisert et al., 2011). Hence, for comparison, we computed probabilistic (“local”) tractography  
580 between our regions of interest (Tournier et al., 2010). This method also uses a Bayesian approach to account  
581 for one or more distributions of fibre orientations within each voxel, thus incorporating uncertainty into the  
582 model (Behrens et al., 2007). To acquire a biologically-accurate measure of apparent fibre density (Raffelt  
583 et al., 2012) along the resultant streamlines, we used the Spherical-Deconvolution Informed Filtering of  
584 Tractograms version 2 (SIFT2) method to weight each streamline by a cross-sectional area multiplier  
585 directly related to the underlying data (Smith et al., 2015, Raffelt et al., 2012). For both the global (producing  
586 ‘fibre count’ as a variable) and local tractography with SIFT2 (producing ‘summed weights’ as a variable),



587 we computed 2 (hemisphere: left, right) by 2 (connection: SC-PUL, PUL-AMG) repeated-measures  
588 ANOVAs to quantitatively examine the properties of these pathways.

## 589 Global tractography

590 Global tractography is a data-driven Bayesian approach to estimating the whole-brain fibre configuration  
591 that best explains the underlying diffusion-weighted images. As opposed to local streamline tracking, global  
592 tractography accounts for the spatial continuity of fibres and thus is better able to discriminate crossing and  
593 fanning fibre geometries (Christiaens et al., 2015). Furthermore, because the simultaneously-reconstructed  
594 fibre configurations are optimised with respect to the data at hand, the density of the final tractogram  
595 quantitatively represents the apparent fibre density (AFD; i.e. the proportion of space occupied by white  
596 matter fibres (Raffelt et al., 2012).

597 We conducted global tractography on the global-intensity-normalised DWI volumes for each participant  
598 using the group-averaged multi-tissue response functions. After 250 million iterations to optimise a full  
599 brain reconstruction, we filtered the tractogram using the ROI masks described above to isolate fibres that  
600 terminated in 1) both the superior colliculus and pulvinar masks, and 2) both the pulvinar and amygdala  
601 masks. We also used the masks for the five individual functionally-defined pulvinar subregions to isolate  
602 the subregion-specific fibres connecting to the superior colliculus and to the amygdala.

## 603 Local tractography

604 As a less conservative approach than global tractography, we also conducted local probabilistic tractography  
605 using our ROIs as seeding and terminating regions. We used the iFOD2 algorithm, iteratively planting a  
606 seed point 25,000 times (or until at least 10,000 tracks had been selected and written) in each voxel of the  
607 seeding ROI (Tournier et al., 2012). We applied the anatomically-constrained variation of this technique,  
608 whereby each participant's five-tissue-type segmented T1 image provided biologically-realistic priors for  
609 streamline generation, reducing the likelihood of false positives (Smith et al., 2012). We edited the final  
610 streamlines so that only those that terminated at white-grey matter boundaries in our ROIs remained.

611 Using these methods, we traced streamlines between the two halves of the subcortical route (i.e. SC to PUL,  
612 PUL to AMG). We then reversed the seeding location (i.e. PUL to SC, AMG to PUL) and based all statistics  
613 on the average between the forwards and backwards seeding directions to reduce any influence of possible  
614 asymmetries in seed ROI volume. We applied SIFT2 to these streamlines to enable us to quantitatively  
615 assess the connectivity. SIFT2 makes this possible by weighting the streamlines by a cross-sectional

616 multiplier such that the sum of these weighting factors better represents the underlying white matter fibre  
617 density (Smith et al., 2012).

## 618 **fMRI analysis**

### 619 **General linear modelling**

620 Using the spatially smoothed fMRI data, we convolved the onset of each Face and Shape block with a  
621 canonical hemodynamic response function (HRF) using SPM12. We closely modelled this first-level  
622 general linear model (GLM) analysis on the work by Hillebrandt et al., (2014), such that we did not slice  
623 time correct the multiband data due to the fast TR. We partitioned the GLM into sessions (left-to-right and  
624 right-to-left encoding) and we included 12 head motion parameters as multiple regressors (6 estimates from  
625 rigid-body transformation, and their temporal derivatives). We generated statistical parametric maps (SPMs)  
626 of the expected BOLD signal for faces minus shapes and shapes minus faces.

627 We then entered the faces minus shapes contrast into a second-level analysis (a one-sample *t*-test) across all  
628 participants. After examining the estimated BOLD signal to Faces at the whole-brain level ( $p < .05$ , family-  
629 wise error corrected), we applied the superior colliculus, pulvinar, and amygdala *a priori* defined masks to  
630 more specifically estimate functional activation in these anatomically-defined areas.

### 631 **Dynamic causal modelling**

632 We implemented Dynamic Causal Modelling (DCM) to infer the causal direction of information flow  
633 between neural regions using a biophysically informed generative model (Friston et al., 2003). First, we  
634 examined the map of significant activation produced by the fMRI analysis of the “Emotion” (i.e. faces vs.  
635 shapes) HCP task. Based on this and our *a priori* hypotheses, we defined the left and right superior  
636 colliculus, pulvinar, amygdala, inferior occipital gyrus (IOG), and fusiform gyrus (FG) as our ROIs. For the  
637 two gyri, we used MNI coordinates of the most significant peak from the group level analysis (left IOG: -  
638 22 -92 -10, right IOG: 28 -90 -8, left FG: -38 -50 -20, right FG: 40 -52 -18). We then placed spheres with a  
639 radius of 12mm around these four coordinates to search for the participant-specific local maxima within  
640 each participant's session-specific SPM for the faces minus shapes contrast (adjusted for the *t* effects of  
641 interest,  $p < .05$  uncorrected). Note that for the purposes of extracting the fMRI data for the DCM nodes,  
642 one does not need corrected *p*-values (Hillebrandt et al., 2014). Next, we defined the ROIs by a 6mm radius  
643 sphere around the participant- and session- specific local maxima. For the subcortical areas of interest, we  
644 defined the initial search radius by the anatomically defined ROI masks (as described above) instead of  
645 significant peaks from the group analysis to confine our search within subcortical grey matter.

646 We used a “two-state” DCM model, which accounts for both excitatory and inhibitory neural populations  
647 (Hillebrandt et al., 2014, Marreiros et al., 2008). Our model space was dictated by our specific, theory-  
648 driven hypotheses about subcortical and cortical visual pathways to the amygdala, as well as by the  
649 significant regions of the BOLD signal observed at the group level in our GLM analysis. Both face and  
650 shape blocks contributed to input parameters within each model. All endogenous and intrinsic connections  
651 in each model were modulated by the effect of faces over shapes.

652 To specify a DCM, each participant needed to have above-threshold activation (at  $p < .05$ , uncorrected)  
653 within each ROI across both scanning sessions. This was the case for 237 out of the 622 participants (see  
654 **Figure 4 – Figure Supplement 1**). The ROIs with the highest numbers of below-threshold participants  
655 were the left and right superior colliculi (261 and 246 participants, respectively), followed by the left and  
656 right pulvinar (46 and 32 participants, respectively), and finally the left and right amygdala (40 and 25  
657 participants, respectively). This may be due to the bilateral superior colliculi’s relatively smaller volume as  
658 well as lower statistical power (its mean  $t$ -statistic was approximately 10.57 compared with 33.35 for IOG  
659 and 30.14 for FG). Critically, the group of 237 participants with above-threshold BOLD responses in all  
660 ROIs did not differ significantly from the other group of 385 participants in the global or local tractography  
661 results (main effect of ‘group’ and interactions with ‘group’ were all  $p > .162$  and  $\eta_p^2 < .003$ ), performance  
662 on the Penn Emotion Recognition task (all independent-samples  $t$ -tests had  $p > .100$ ), volume of the  
663 thalamus (left:  $p = .055$ , right:  $p = .987$ ) / amygdala (left:  $p = .472$ , right:  $p = .394$ ) / fusiform area (left:  $p =$   
664  $.677$ , right:  $p = .597$ ) / lateral occipital area (left:  $p = .762$ , right:  $p = .679$ ; volumes computed by Freesurfer),  
665 median reaction time (faces:  $p = .418$ , shapes:  $p = .617$ ) and accuracy (faces:  $p = .417$ , shapes:  $p = .717$ )  
666 during the fMRI task, age ( $p = .782$ ), or gender ( $p = .359$ ). Therefore, using the information available to us,  
667 we had no evidence to assume that our DCM sample was biased by any confounding variable.

668 The final model space consisted of 102 models (see **Fig. 5**), where the first Cortical family contained six  
669 models, the second and third Cortical families contained 12 models each, and the Dual families (families 4,  
670 5, and 6) contained 24 models each. The different families correspond to different input types (superior  
671 colliculus only, pulvinar only, or superior colliculus and pulvinar) and the different models within these  
672 families arise from different combinations of forward and backward connections. Each of the final 102  
673 DCMs were modelled separately for both fMRI sessions. Both hemispheres were included in each model  
674 with no cross-hemispheric connections. To determine which model best explained the data, we conducted  
675 family-wise Bayesian Model Selection (Stephan et al., 2009; Rigoux et al., 2014), which penalises models  
676 for complexity according to the free energy principle (Friston et al., 2006). We used the random effects

677 implementation to account for potential individual differences in the recruitment of a subcortical pathway  
678 for viewing faces (Stephan et al., 2009).

## 679 **ACKNOWLEDGEMENTS**

680 Data were provided by the Human Connectome Project, WU-Minn Consortium (Principal Investigators:  
681 David Van Essen and Kamil Ugurbil; 1U54MH091657) funded by the 16 NIH Institutes and Centers that  
682 support the NIH Blueprint for Neuroscience Research; and by the McDonnell Center for Systems  
683 Neuroscience at Washington University. This work was funded by a University of Queensland Fellowship  
684 (2016000071) to MIG, an Australian Research Council (ARC) Australian Laureate Fellowship  
685 (FL110100103) and an ARC Centre of Excellence for Integrative Brain Function grant (CE140100007) to  
686 MIG and JBM, and an ARC Australian Postgraduate Award to JM.

## 687 **Code Availability**

688 All computer code that was used to produce the results (from raw HCP data to track counts, fibre density,  
689 BOLD signal and DCM files) is freely available online via GitHub ([https://github.com/jjmcfadyen/hcp-](https://github.com/jjmcfadyen/hcp-diffusion-dcm)  
690 [diffusion-dcm](https://github.com/jjmcfadyen/hcp-diffusion-dcm)) and the Open Science Framework ([doi:10.17605/OSF.IO/KBPWM](https://doi.org/10.17605/OSF.IO/KBPWM)).

## 691 **Data availability**

692 The data analysed in this study came from the publicly-available Human Connectome Project S900 release:  
693 <https://www.humanconnectome.org/study/hcp-young-adult/document/900-subjects-data-release>.  
694 Restricted access was obtained through the HCP to acquire specific participant ages (in years) and  
695 drug/alcohol information. Ethical permission was granted by the University of Queensland Human Research  
696 Ethics Committee. No figures display raw data.

## 697 **DECLARATION OF INTERESTS**

698 All authors declare no competing interests.

## 699 **REFERENCES**

700 AMUNTS, K., KEDO, O., KINDLER, M., PIEPERHOFF, P., MOHLBERG, H., SHAH, N.J., HABEL,  
701 U., SCHNEIDER, F. AND ZILLES, K., 2005. Cytoarchitectonic mapping of the human amygdala,

- 702 hippocampal region and entorhinal cortex: intersubject variability and probability maps. *Anatomy*  
703 *and embryology*, 210, 343-352.
- 704 BARCH, D. M., BURGESS, G. C., HARMS, M. P., PETERSEN, S. E., SCHLAGGAR, B. L.,  
705 CORBETTA, M., GLASSER, M. F., CURTISS, S., DIXIT, S., FELDT, C., NOLAN, D., BRYANT,  
706 E., HARTLEY, T., FOOTER, O., BJORK, J. M., POLDRACK, R., SMITH, S., JOHANSEN-  
707 BERG, H., SNYDER, A. Z., ESSEN, D. C. & FOR THE CONSORTIUM, W. U. M. 2013. Function  
708 in the human connectome: Task-fMRI and individual differences in behavior. *NeuroImage*, 80, 169-  
709 189.
- 710 BARRON, D. S., EICKHOFF, S. B., CLOS, M. & FOX, P. T. 2015. Human pulvinar functional  
711 organization and connectivity. *Human Brain Mapping*, 36, 2417-2431.
- 712 BAUM, G.L., ROALF, D.R., COOK, P.A., CIRIC, R., ROSEN, A.F., XIA, C., ELLIOTT, M.A.,  
713 RUPAREL, K., VERMA, R., TUNÇ, B. AND GUR, R.C., 2018. The impact of in-scanner head  
714 motion on structural connectivity derived from diffusion MRI. *Neuroimage*, 173, 275-  
715 286. BEHRENS, T. E. J., BERG, J. H., JBABDI, S., RUSHWORTH, M. F. S. & WOOLRICH, M.  
716 W. 2007. Probabilistic diffusion tractography with multiple fibre orientations: What can we gain?  
717 *NeuroImage*, 34, 144-155.
- 718 BERMAN, R. A. & WURTZ, R. H. 2011. Signals Conveyed in the Pulvinar Pathway from Superior  
719 Colliculus to Cortical Area MT. *The Journal of Neuroscience*, 31, 373-384.
- 720 BRIDGE, H., LEOPOLD, D. A. & BOURNE, J. A. 2016. Adaptive Pulvinar Circuitry Supports Visual  
721 Cognition. *Trends in Cognitive Sciences*, 20, 146-157.
- 722 BURRA, N., HERVAIS-ADELMAN, A., CELEGHIN, A., DE GELDER, B. AND PEGNA, A.J., 2017.  
723 Affective blindsight relies on low spatial frequencies. *Neuropsychologia*.  
724
- 725 CHRISTIAENS, D., REISERT, M., DHOLLANDER, T., SUNAERT, S., SUETENS, P. & MAES, F. 2015.  
726 Global tractography of multi-shell diffusion-weighted imaging data using a multi-tissue model.  
727 *NeuroImage*, 123, 89-101.
- 728 COWEY, A., STOERIG, P. & BANNISTER, M. 1994. Retinal ganglion cells labelled from the pulvinar  
729 nucleus in macaque monkeys. *Neuroscience*, 61, 691-705.
- 730 FRISTON, K. J., HARRISON, L. & PENNY, W. 2003. Dynamic causal modelling. *Neuroimage*, 19, 1273-  
731 302.
- 732 FRISTON, K., KILNER, J. AND HARRISON, L., 2006. A free energy principle for the brain. *Journal of*  
733 *Physiology-Paris*, 100, 70-87.  
734
- 735 GARVERT, M. M., FRISTON, K. J., DOLAN, R. J. & GARRIDO, M. I. 2014. Subcortical amygdala  
736 pathways enable rapid face processing. *NeuroImage*, 102, 309-316.
- 737 GLASSER, M. F., SOTIROPOULOS, S. N., WILSON, J. A., COALSON, T. S., FISCHL, B.,  
738 ANDERSSON, J. L., XU, J., JBABDI, S., WEBSTER, M., POLIMENI, J. R., VAN ESSEN, D. C.,  
739 JENKINSON, M. & CONSORTIUM, W. U. M. 2013. The minimal preprocessing pipelines for the  
740 Human Connectome Project. *NeuroImage*, 80, 105-124.



- 741 GOMES, N., SOARES, S. C., SILVA, S. & SILVA, C. F. 2017. Mind the Snake: Fear Detection Relies on  
742 Low Spatial Frequencies.
- 743 GREEN S.A., HERNANDEZ L., BOOKHEIMER S.Y., DAPRETTO M. (2017) Reduced modulation of  
744 thalamocortical connectivity during exposure to sensory stimuli in ASD. *Autism Research*, 10, 801-  
745 809.
- 746 HADJIKHANI, N., JOHNELS, J., ZÜRCHER, N. R., LASSALLE, A., GUILLON, Q., HIPPOLYTE, L.,  
747 BILLSTEDT, E., WARD, N., LEMONNIER, E. & GILLBERG, C. 2017. Look me in the eyes:  
748 constraining gaze in the eye-region provokes abnormally high subcortical activation in autism.  
749 *Scientific Reports*, 7, 3163.
- 750 HAKAMATA, Y., SATO, E., KOMI, S., MORIGUCHI, Y., IZAWA, S., MURAYAMA, N.,  
751 HANAKAWA, T., INOUE, Y. & TAGAYA, H. 2016. The functional activity and effective  
752 connectivity of pulvinar are modulated by individual differences in threat-related attentional bias.  
753 *Scientific Reports*, 6, 34777.
- 754 HARIRI, A. R., MATTAY, V. S., TESSITORE, A., KOLACHANA, B., FERA, F., GOLDMAN, D.,  
755 EGAN, M. F. & WEINBERGER, D. R. 2002. Serotonin Transporter Genetic Variation and the  
756 Response of the Human Amygdala. *Science*, 297, 400-403.
- 757 HILLEBRANDT, H., FRISTON, K. J. & BLAKEMORE, S.-J. 2014. Effective connectivity during animacy  
758 perception - dynamic causal modelling of Human Connectome Project data. *Scientific Reports*, 4,  
759 6240.
- 760 HORTENSIUS, R., TERBURG, D., MORGAN, B., STEIN, D.J., VAN HONK, J. and DE GELDER, B.,  
761 2016. The role of the basolateral amygdala in the perception of faces in natural contexts. *Phil. Trans.*  
762 *R. Soc. B*, 371, 20150376.
- 763 HU Y., CHEN Z., HUANG L., XI Y., LI B., WANG H., YAN J., LEE T.M., TAO Q., & SO K. F. (2017)  
764 A translational study on looming-evoked defensive response and the underlying subcortical pathway  
765 in autism. *Scientific reports*, 7, 14755.
- 766 JBABDI, S. & JOHANSEN-BERG, H. 2011. Tractography: Where Do We Go from Here? *Brain*  
767 *Connectivity*, 1, 169-183.
- 768 JEURISSEN, B., TOURNIER, J.-D., DHOLLANDER, T., CONNELLY, A. & SIJBERS, J. 2014. Multi-  
769 tissue constrained spherical deconvolution for improved analysis of multi-shell diffusion MRI data.  
770 *NeuroImage*, 103, 411-426.
- 771 JOHNSON, M. H. 2005. Subcortical face processing. *Nature Reviews Neuroscience*, 6, 766-774.
- 772 KLEINHANS N.M., RICHARDS T., JOHNSON L.C., WEAVER K.E., GREENSON J., DAWSON G., &  
773 AYLWARD E. (2011) fMRI evidence of neural abnormalities in the subcortical face processing  
774 system in ASD. *Neuroimage*, 54, 697-704.
- 775 KOLLER, K., RAFAL, R. D., PLATT, A. & MITCHELL, N. D. 2018. Orienting toward threat:  
776 Contributions of a subcortical pathway transmitting retinal afferents to the amygdala via the superior  
777 colliculus and pulvinar. *Neuropsychologia*.
- 778 LEDOUX, J. 1998. The emotional brain: The mysterious underpinnings of emotional life. *Simon and*  
779 *Schuster*.

- 780 LEPPÄNEN, J.M. AND NELSON, C.A., 2009. Tuning the developing brain to social signals of emotions.  
781 *Nature Reviews Neuroscience*, 10, 37.  
782
- 783 MAIOR, R. S., HORI, E., TOMAZ, C., ONO, T. & NISHIJO, H. 2010. The monkey pulvinar neurons  
784 differentially respond to emotional expressions of human faces. *Behavioural Brain Research*, 215,  
785 129-135.
- 786 MARREIROS, A. C., KIEBEL, S. J. & FRISTON, K. J. 2008. Dynamic causal modelling for fMRI: A two-  
787 state model. *NeuroImage*, 39, 269-278.
- 788 MCFADYEN, J. 2018. hcp-diffusion-dcm. GitHub. <https://github.com/jjmcfdyen/hcp-diffusion-dcm> v1.0
- 789 MCFADYEN, J., MERMILLOD, M., MATTINGLEY, J. B., HALÁSZ, V. & GARRIDO, M. I. 2017. A  
790 Rapid Subcortical Amygdala Route for Faces Irrespective of Spatial Frequency and Emotion. *The*  
791 *Journal of Neuroscience*, 37, 3864-3874.
- 792 MÉNDEZ-BÉRTOLO, C., MORATTI, S., TOLEDANO, R., LOPEZ-SOSA, F., MARTÍNEZ-ALVAREZ,  
793 R., MAH, Y.H., VUILLEUMIER, P., GIL-NAGEL, A. AND STRANGE, B.A., 2016. A fast  
794 pathway for fear in human amygdala. *Nature neuroscience*, 19, 1041.  
795
- 796 MOREL, A., MAGNIN, M. & JEANMONOD, D. 1997. Multiarchitectonic and stereotactic atlas of the  
797 human thalamus. *Journal of Comparative Neurology*, 387, 588-630.
- 798 MORI, S., OISHI, K. AND FARIA, A.V., 2009. White matter atlases based on diffusion tensor imaging.  
799 *Current opinion in neurology*, 22, 362.
- 800 MORRIS, D. M., EMBLETON, K. V. & PARKER, G. 2008. Probabilistic fibre tracking: Differentiation of  
801 connections from chance events. *NeuroImage*, 42, 1329-1339.
- 802 MORRIS, J.S., ÖHMAN, A. AND DOLAN, R.J., 1998. Conscious and unconscious emotional learning in  
803 the human amygdala. *Nature*, 393, 467.  
804
- 805 MORRIS, J. S., ÖHMAN, A. & DOLAN, R. J. 1999. A subcortical pathway to the right amygdala mediating  
806 “unseen” fear. *Proceedings of the National Academy of Sciences*, 96, 1680-1685.
- 807 NAKATAKI M., SORAVIA L.M., SCHWAB S., HORN H., DIERKS T., STRIK W., WIEST R.,  
808 HEINRICHS M., DE QUERVAIN D.J., & FEDERSPIEL A. (2017) Glucocorticoid administration  
809 improves aberrant fear-processing networks in spider phobia. *Neuropsychopharmacology*, 42, 485.
- 810 PEGNA, A. J., KHATEB, A., LAZEYRAS, F. & SEGHIER, M. L. 2005. Discriminating emotional faces  
811 without primary visual cortices involves the right amygdala. *Nature Neuroscience*, 8.
- 812 PESSOA, L. & ADOLPHS, R. 2010. Emotion processing and the amygdala: from a 'low road' to 'many  
813 roads' of evaluating biological significance. *Nature Reviews Neuroscience*, 11, 773-783.
- 814 PESSOA, L. & ADOLPHS, R. 2011. Emotion and the brain: multiple roads are better than one. *Nature*  
815 *Reviews Neuroscience*, 12, 425-425.
- 816 RAFAL, R. D., KOLLER, K., BULTITUDE, J. H., MULLINS, P., WARD, R., MITCHELL, A. S. & BELL,  
817 A. H. 2015. Connectivity between the superior colliculus and the amygdala in humans and macaque

- 818 monkeys: virtual dissection with probabilistic DTI tractography. *Journal of Neurophysiology*, 114,  
819 1947-1962.
- 820 RAFFELT, D., TOURNIER, J. D., ROSE, S., RIDGWAY, G. R., HENDERSON, R., CROZIER, S.,  
821 SALVADO, O. & CONNELLY, A. 2012. Apparent Fibre Density: A novel measure for the analysis  
822 of diffusion-weighted magnetic resonance images. *NeuroImage*, 59, 3976-3994.
- 823 REISERT, M., MADER, I., ANASTASOPOULOS, C., WEIGEL, M., SCHNELL, S. & KISELEV, V.  
824 2011. Global fiber reconstruction becomes practical. *NeuroImage*, 54, 955-962.
- 825 RIGOUX, L., STEPHAN, K. E., FRISTON, K. J. & DAUNIZEAU, J. 2014. Bayesian model selection for  
826 group studies — Revisited. *NeuroImage*, 84, 971-985.
- 827 RUDRAUF, D., DAVID, O., LACHAUX, J.-P., KOVACH, C. K., MARTINERIE, J., RENAULT, B. &  
828 DAMASIO, A. 2008. Rapid Interactions between the Ventral Visual Stream and Emotion-Related  
829 Structures Rely on a Two-Pathway Architecture. *The Journal of Neuroscience*, 28, 2793-2803.
- 830 SCHNEIDER, W., ESCHMAN, A., ZUCCOLOTTO, A. & BURGESS, S. 2002. E-prime. *Psychology*  
831 *Software Tools*.
- 832 SHANG, C., LIU, Z., CHEN, Z., SHI, Y., WANG, Q., LIU, S., LI, D. & CAO, P. 2015. A parvalbumin-  
833 positive excitatory visual pathway to trigger fear responses in mice. *Science*, 348, 1472-1477.
- 834 SILVERSTEIN, D. N. & INGVAR, M. 2015. A multi-pathway hypothesis for human visual fear signaling.  
835 *Frontiers in Systems Neuroscience*, 9, 101.
- 836 SMITH, R. E., TOURNIER, J.-D., CALAMANTE, F. & CONNELLY, A. 2012. Anatomically-constrained  
837 tractography: Improved diffusion MRI streamlines tractography through effective use of anatomical  
838 information. *NeuroImage*, 62, 1924-1938.
- 839 SMITH, R. E., TOURNIER, J.-D., CALAMANTE, F. & CONNELLY, A. 2015. SIFT2: Enabling dense  
840 quantitative assessment of brain white matter connectivity using streamlines tractography.  
841 *NeuroImage*, 119, 338-351.
- 842 SOARES, S. C., MAIOR, R. S., ISBELL, L. A., TOMAZ, C. & NISHIJO, H. 2017. Fast Detector/First  
843 Responder: Interactions between the Superior Colliculus-Pulvinar Pathway and Stimuli Relevant to  
844 Primates. *Frontiers in Neuroscience*, 11.
- 845 STEPHAN, K. E., PENNY, W. D., DAUNIZEAU, J., MORAN, R. J. & FRISTON, K. J. 2009. Bayesian  
846 Model Selection for Group Studies. *NeuroImage*, 47.
- 847 TADAYONNEJAD R., KLUMPP H., AJILORE O., LEOW A., & PHAN K.L. (2016) Aberrant pulvinar  
848 effective connectivity in generalized social anxiety disorder. *Medicine*, 95.
- 849 TAMIETTO, M. & DE GELDER, B. 2010. Neural bases of the non-conscious perception of emotional  
850 signals. *Nature Reviews Neuroscience*, 11, 697-709.
- 851 TAMIETTO, M., PULLENS, P., DE GELDER, B., WEISKRANTZ, L. & GOEBEL, R. 2012. Subcortical  
852 connections to human amygdala and changes following destruction of the visual cortex. *Current*  
853 *biology : CB*, 22, 1449-1455.
- 854 TAMRAZ, J. C. & COMAIR, Y. G. 2004. Atlas of regional anatomy of the brain using MRI. *Springer-*  
855 *Verlag*.

- 856 TOURNIER, J. D., CALAMANTE, F. & CONNELLY, A. 2010. Improved probabilistic streamlines  
857 tractography by 2nd order integration over fibre orientation distributions. *Improved probabilistic*  
858 *streamlines tractography by 2nd order integration over fibre orientation distributions*, 1670.
- 859 TOURNIER, J. D., CALAMANTE, F. & CONNELLY, A. 2012. MRtrix: Diffusion tractography in  
860 crossing fiber regions. *International Journal of Imaging Systems and Technology*, 22, 53-66.
- 861 VAN ESSEN, D. C., SMITH, S. M., BARCH, D. M., BEHRENS, T. E., YACOUB, E., UGURBIL, K. &  
862 CONSORTIUM, W. U. M. 2013. The WU-Minn Human Connectome Project: an overview.  
863 *NeuroImage*, 80, 62-79.
- 864 VAN ESSEN, D. C., UGURBIL, K., AUERBACH, E., BARCH, D., BEHRENS, T. E. J., BUCHOLZ, R.,  
865 CHANG, A., CHEN, L., CORBETTA, M., CURTISS, S. W., PENNA, D. S., FEINBERG, D.,  
866 GLASSER, M. F., HAREL, N., HEATH, A. C., LARSON-PRIOR, L., MARCUS, D.,  
867 MICHALAREAS, G., MOELLER, S., OOSTENVELD, R., PETERSEN, S. E., PRIOR, F.,  
868 SCHLAGGAR, B. L., SMITH, S. M., SNYDER, A. Z., XU, J., YACOUB, E. & CONSORTIUM,  
869 W. U. M. 2012. The Human Connectome Project: A data acquisition perspective. *NeuroImage*, 62,  
870 2222-2231.
- 871 VUILLEUMIER, P., ARMONY, J. L., DRIVER, J. & DOLAN, R. J. 2003. Distinct spatial frequency  
872 sensitivities for processing faces and emotional expressions. *Nature Neuroscience*, 6, 624-631.
- 873 WALL, M. B., WALKER, R. & SMITH, A. T. 2009. Functional imaging of the human superior colliculus:  
874 an optimised approach. *Neuroimage*, 47, 1620-1627.
- 875 WEI, P., LIU, N., ZHANG, Z., LIU, X., TANG, Y., HE, X., WU, B., ZHOU, Z., LIU, Y., LI, J., ZHANG,  
876 Y., ZHOU, X., XU, L., CHEN, L., BI, G., HU, X., XU, F. & WANG, L. 2015. Processing of visually  
877 evoked innate fear by a non-canonical thalamic pathway. *Nature Communications*, 6.
- 878 ZHOU, H., SCHAFER, R. & DESIMONE, R. 2016. Pulvinar-Cortex Interactions in Vision and Attention.  
879 *Neuron*, 89, 209-220.
- 880 ZHOU, N. A., MAIRE, I. S., TERSON, S. P. & BICKFORD, M. E. 2017. The mouse pulvinar nucleus:  
881 Organization of the tectorecipient zones. *Visual Neuroscience*, 34.
- 882
